# Supplementary material for: Metal-Organic Framework vs. Coordination Polymer—Influence of the Lanthanide on the Nature of the Heteroleptic Anilate/Terephtalate 3D Network
Source: MDPI journal article supplement (doi:10.3390/cryst12060763), 2022-05-26
Supplement: s1 [file s1]

## SUPPORTING INFORMATION

### Metal-Organic Framework vs. Coordination Polymer—Influence of the Lanthanide on the Nature of the Heteroleptic Anilate/Terephthalate 3D Network

**Mariangela Oggianu<sup>1,2</sup>, Fabio Manna<sup>1,3</sup>, Suchithra Ashoka Sahadevan<sup>1,3</sup>, Narcis Avarvari<sup>3</sup>, Alexandre Abhervé<sup>3,\*</sup> and Maria Laura Mercuri<sup>1,2,\*</sup>**

<sup>1</sup> Dipartimento di Scienze Chimiche e Geologiche, Università degli Studi di Cagliari, I-09042 Monserrato, Cagliari, Italy; mari.oggianu@gmail.com (M.O.); fmanna@etud.univ-angers.fr (F.M.); suchithraiiserk@gmail.com (S.A.S.)

<sup>2</sup> INSTM, Cagliari Unit, Via Giuseppe Giusti, 9, 50121 Firenze, Italy

<sup>3</sup> Univ Angers, CNRS, MOLTECH-Anjou, SFR MATRIX, F-49000 Angers, France; narcis.avarvari@univ-angers.fr

\* Correspondence: alexandre.abherve@univ-angers.fr (A.A.); mercuri@unica.it (M.L.M.)

**Table S1.** Crystallographic data for **1–3**.

|                                                        | [Yb <sub>2</sub> (μ-CICNAn) <sub>2</sub><br>(μ-F <sub>4</sub> BDC)(H <sub>2</sub> O) <sub>4</sub> ·(H <sub>2</sub> O) <sub>3</sub><br>(1) | [Er <sub>2</sub> (μ-CICNAn) <sub>2</sub><br>(μ-F <sub>4</sub> BDC)(H <sub>2</sub> O) <sub>4</sub> ·(H <sub>2</sub> O) <sub>4</sub><br>(2) | [Eu <sub>2</sub> (μ-CICNAn) <sub>2</sub><br>(μ-F <sub>4</sub> BDC)(H <sub>2</sub> O) <sub>6</sub> ]<br>(3)    |
|--------------------------------------------------------|-------------------------------------------------------------------------------------------------------------------------------------------|-------------------------------------------------------------------------------------------------------------------------------------------|---------------------------------------------------------------------------------------------------------------|
| Empirical formula                                      | C <sub>22</sub> H <sub>14</sub> N <sub>2</sub> O <sub>19</sub> F <sub>4</sub> Cl <sub>2</sub> Yb <sub>2</sub>                             | C <sub>22</sub> H <sub>16</sub> N <sub>2</sub> O <sub>20</sub> F <sub>4</sub> Cl <sub>2</sub> Yb <sub>2</sub>                             | C <sub>22</sub> H <sub>12</sub> N <sub>2</sub> O <sub>18</sub> F <sub>4</sub> Cl <sub>2</sub> Eu <sub>2</sub> |
| Fw                                                     | 1103.33                                                                                                                                   | 1109.79                                                                                                                                   | 1043.16                                                                                                       |
| Crystal color                                          | red                                                                                                                                       | red                                                                                                                                       | red                                                                                                           |
| Crystal size (mm <sup>3</sup> )                        | 0.03*0.03*0.02                                                                                                                            | 0.12*0.05*0.04                                                                                                                            | 0.10*0.08*0.05                                                                                                |
| Temperature (K)                                        | 150                                                                                                                                       | 270                                                                                                                                       | 220                                                                                                           |
| Wavelength (Å)                                         | 1.54184                                                                                                                                   | 1.54184                                                                                                                                   | 1.54184                                                                                                       |
| Crystal system, Z                                      | Triclinic, 1                                                                                                                              | Triclinic, 1                                                                                                                              | Monoclinic, 4                                                                                                 |
| Space group                                            | <i>P</i> -1                                                                                                                               | <i>P</i> -1                                                                                                                               | <i>I</i> 2/ <i>a</i>                                                                                          |
| a (Å)                                                  | 5.0711 (2)                                                                                                                                | 5.1064 (2)                                                                                                                                | 19.3998 (8)                                                                                                   |
| b (Å)                                                  | 10.7697 (7)                                                                                                                               | 10.7800 (13)                                                                                                                              | 9.2617 (3)                                                                                                    |
| c (Å)                                                  | 14.6511 (9)                                                                                                                               | 14.7311 (14)                                                                                                                              | 18.5209 (8)                                                                                                   |
| α (°)                                                  | 95.915 (5)                                                                                                                                | 95.821 (9)                                                                                                                                | 90                                                                                                            |
| β (°)                                                  | 99.675 (4)                                                                                                                                | 99.673 (6)                                                                                                                                | 121.571 (6)                                                                                                   |
| γ (°)                                                  | 90.477 (5)                                                                                                                                | 90.532 (7)                                                                                                                                | 90                                                                                                            |
| V (Å <sup>3</sup> )                                    | 784.31 (8)                                                                                                                                | 794.97 (13)                                                                                                                               | 2835.2 (2)                                                                                                    |
| ρ <sub>calc</sub> (g·cm <sup>-3</sup> )                | 2.336                                                                                                                                     | 2.318                                                                                                                                     | 2.444                                                                                                         |
| μ(CuKα) (mm <sup>-1</sup> )                            | 13.334                                                                                                                                    | 12.112                                                                                                                                    | 34.181                                                                                                        |
| θ range (°)                                            | 3.077–73.515                                                                                                                              | 3.060–71.980                                                                                                                              | 5.353–72.002                                                                                                  |
| Data collected                                         | 5935                                                                                                                                      | 5303                                                                                                                                      | 5883                                                                                                          |
| Data unique                                            | 3033                                                                                                                                      | 5303                                                                                                                                      | 2714                                                                                                          |
| Data observed                                          | 2830                                                                                                                                      | 4819                                                                                                                                      | 2530                                                                                                          |
| R(int)                                                 | 0.0337                                                                                                                                    | 0.1949                                                                                                                                    | 0.0418                                                                                                        |
| Nb of parameters / restraints                          | 244/32                                                                                                                                    | 225/10                                                                                                                                    | 267/18                                                                                                        |
| R1( <i>F</i> ), <sup>a</sup> <i>I</i> > 2σ( <i>I</i> ) | 0.0728                                                                                                                                    | 0.1614                                                                                                                                    | 0.0355                                                                                                        |
| wR2( <i>F</i> <sup>2</sup> ), <sup>b</sup> all data    | 0.2344                                                                                                                                    | 0.4610                                                                                                                                    | 0.0883                                                                                                        |
| S( <i>F</i> <sup>2</sup> ), <sup>c</sup> all data      | 1.134                                                                                                                                     | 2.290                                                                                                                                     | 1.087                                                                                                         |
| CCDC number                                            | 21708733                                                                                                                                  | 21708734                                                                                                                                  | 21708735                                                                                                      |

$$^a R1(F) = \sum \|F_0\| - \|F_C\| / \sum \|F_0\|; ^b wR2(F^2) = [\sum w(F_0^2 - F_C^2)^2 / \sum wF_0^4]^{1/2}; ^c S(F^2) = [\sum w(F_0^2 - F_C^2) / (n+r-p)]^{1/2}.$$

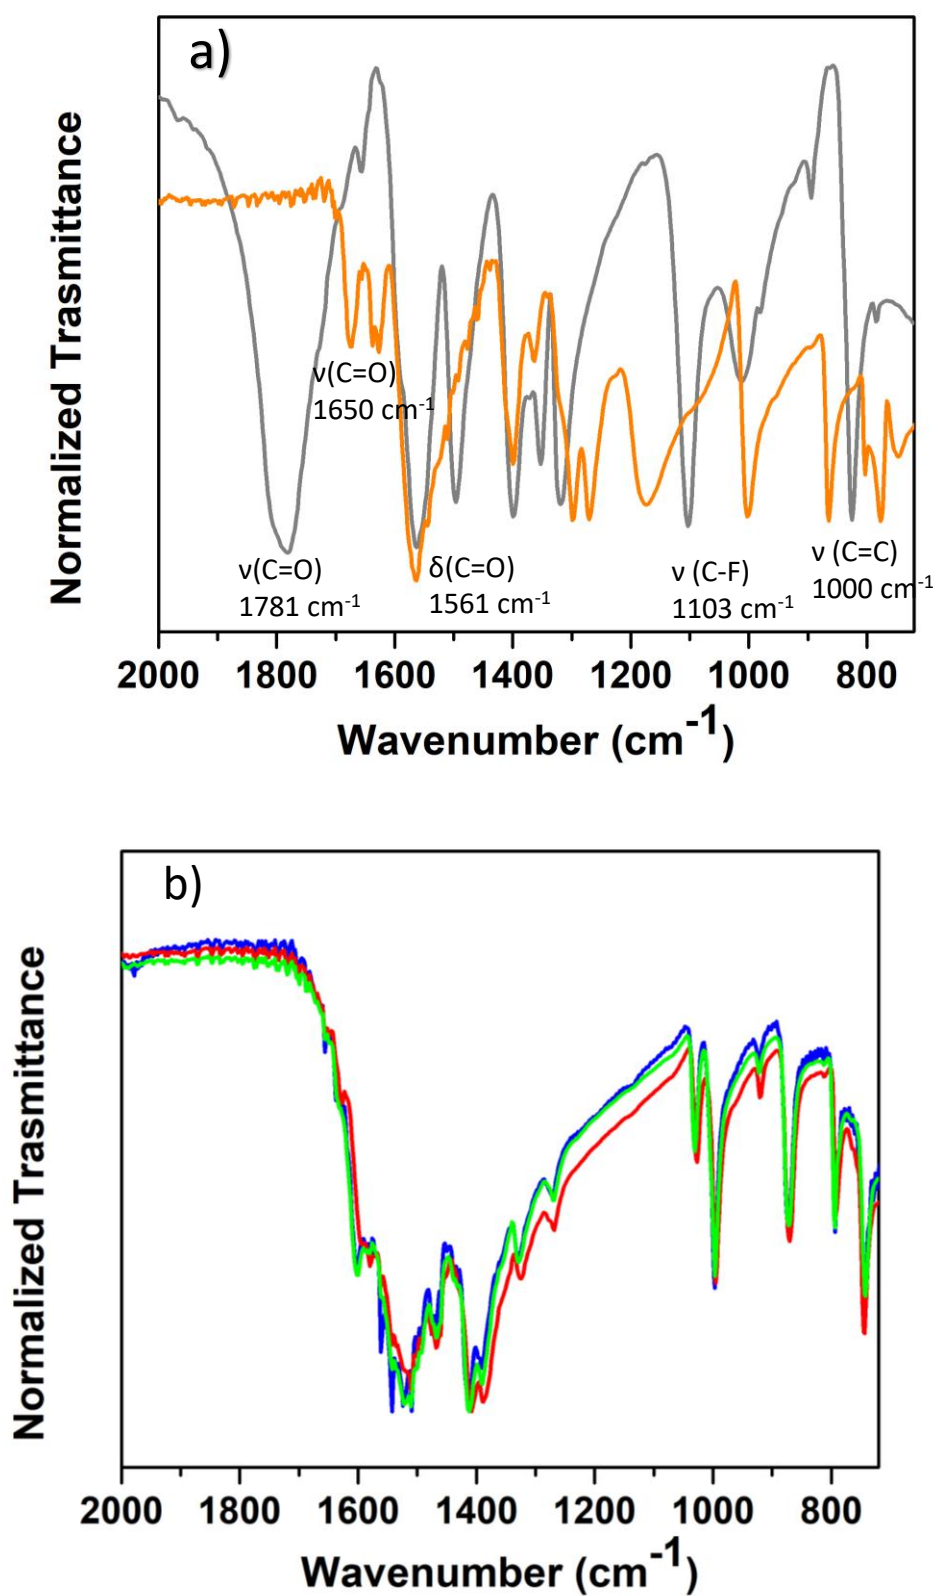

**Figure S1.** FT-IR spectra of: a) KHClCNAN (orange line),  $\text{H}_2\text{F}_4\text{BDC}$  (grey line) and b) **1** (red line), **2** (blue line) **3** (green line), in the 2000-700  $\text{cm}^{-1}$  region.

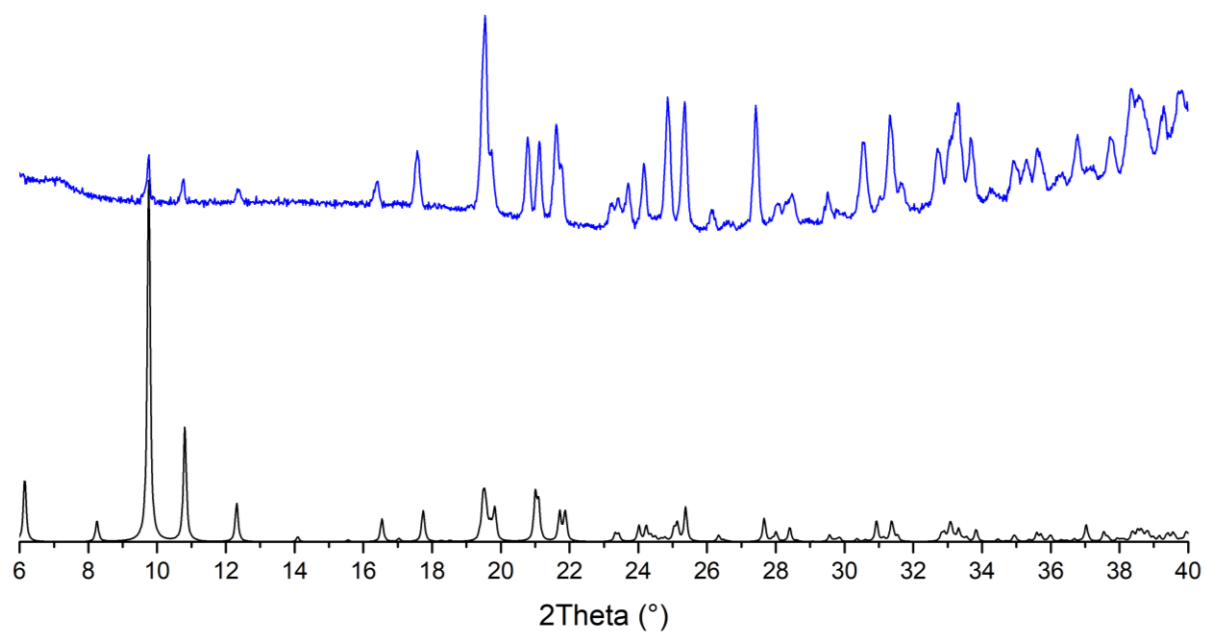

**Figure S2.** Simulated (black) and experimental (blue) X-ray powder patterns of **1**.

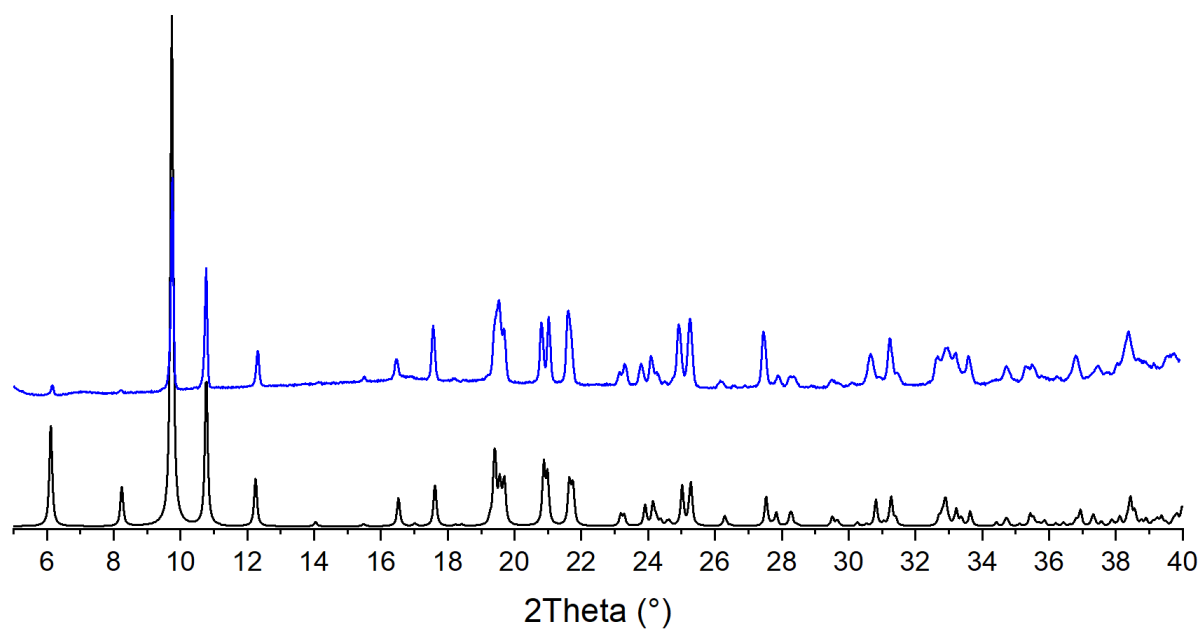

**Figure S3.** Simulated (black) and experimental (blue) X-ray powder patterns of **2**.

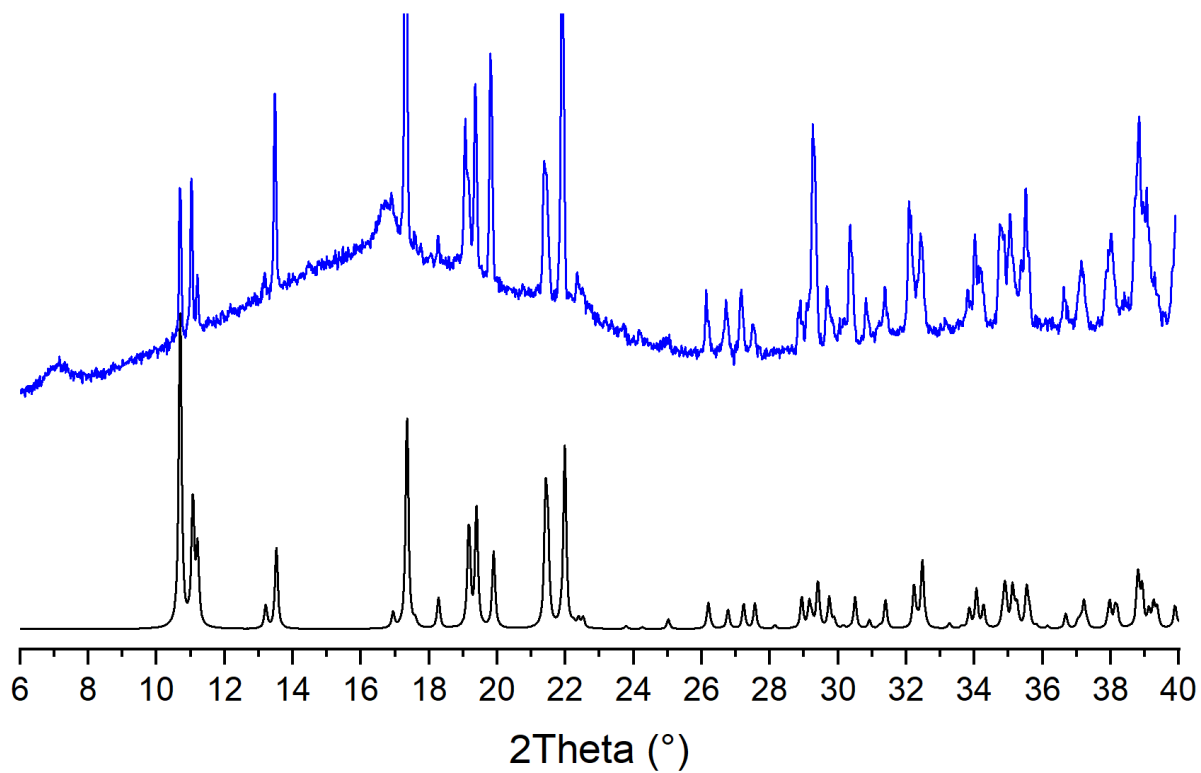

**Figure S4.** Simulated (black) and experimental (blue) X-ray powder patterns of **3**.

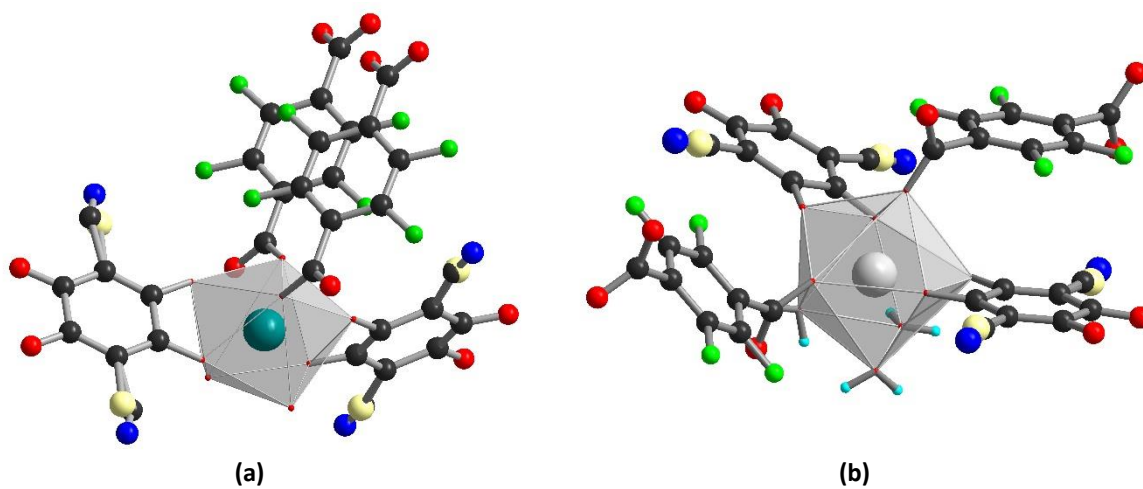

**Figure S5.** Coordination environment of the metal ion in **1** (a) and **3** (b). Color code: C (black), H (cyan), O (red), N (blue), F (green), Cl (light yellow), Yb (teal), Eu (grey).

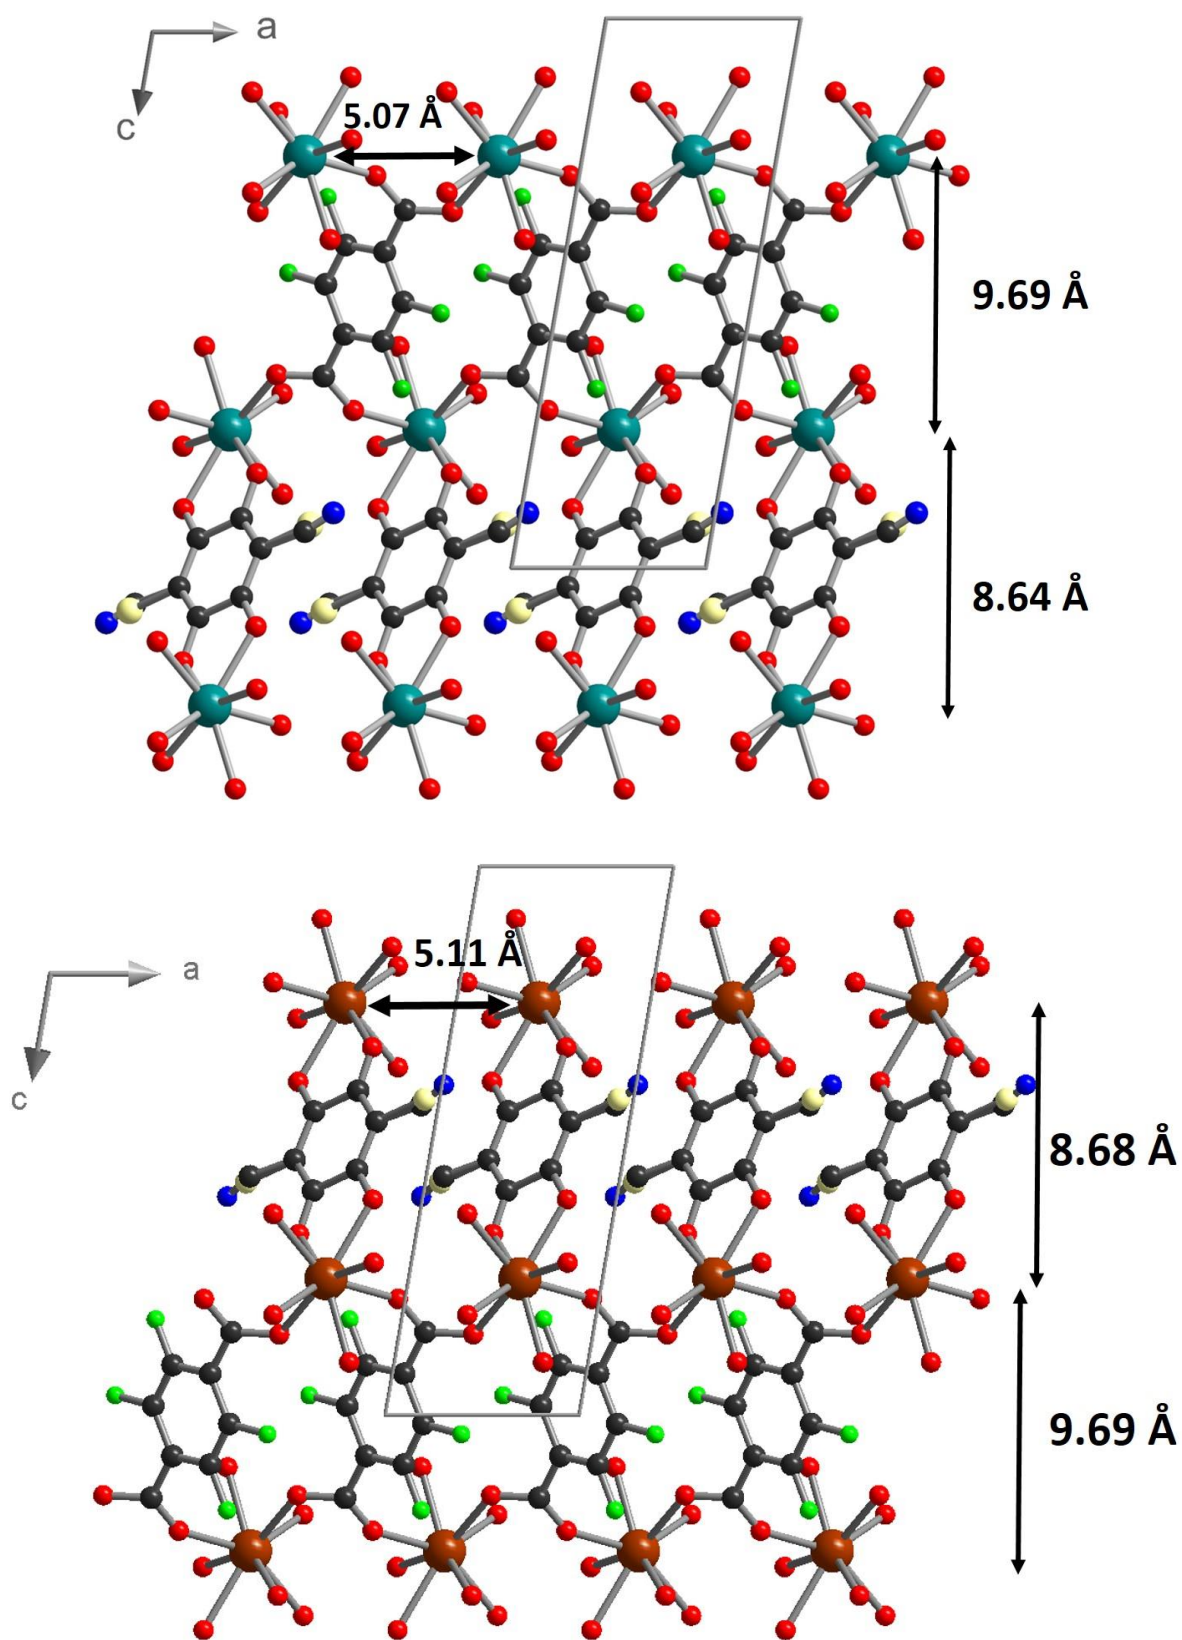

**Figure S6.** View of the crystal structures of **1** (top) and **2** (bottom) in the *ac* plane highlighting the shortest Ln(III)···Ln(III) distances. Color code: C (black), O (red), N (blue), F (green), Cl (light yellow), Yb (teal), Er (brown).

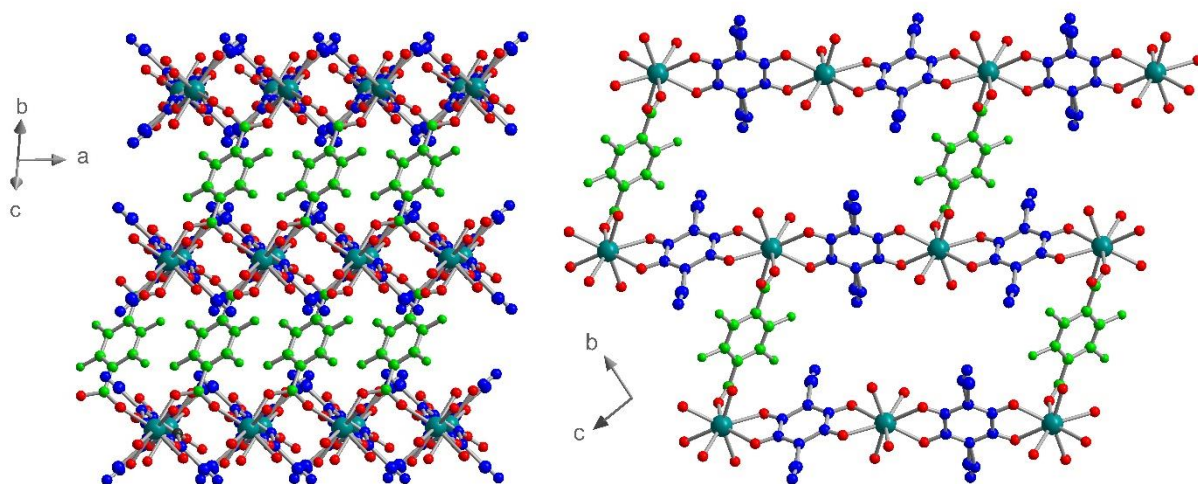

**Figure S7.** Views of the extended structure in **1**. ClCNAn<sup>2-</sup> and F<sub>4</sub>BDC<sup>2-</sup> are highlighted in blue and green respectively.

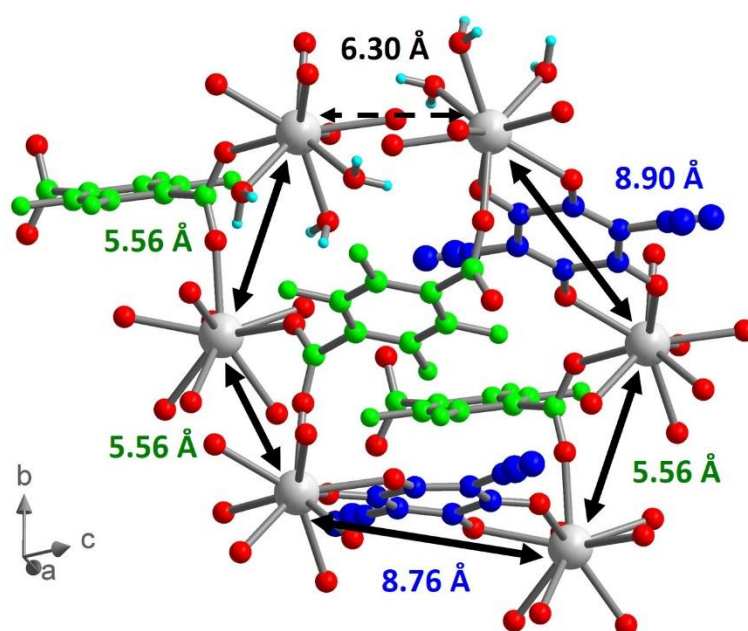

**Figure S8.** View of the crystal structure of **3** highlighting the shortest Eu...Eu distances. ClCNAn<sup>2-</sup> and F<sub>4</sub>BDC<sup>2-</sup> are highlighted in blue and green respectively.



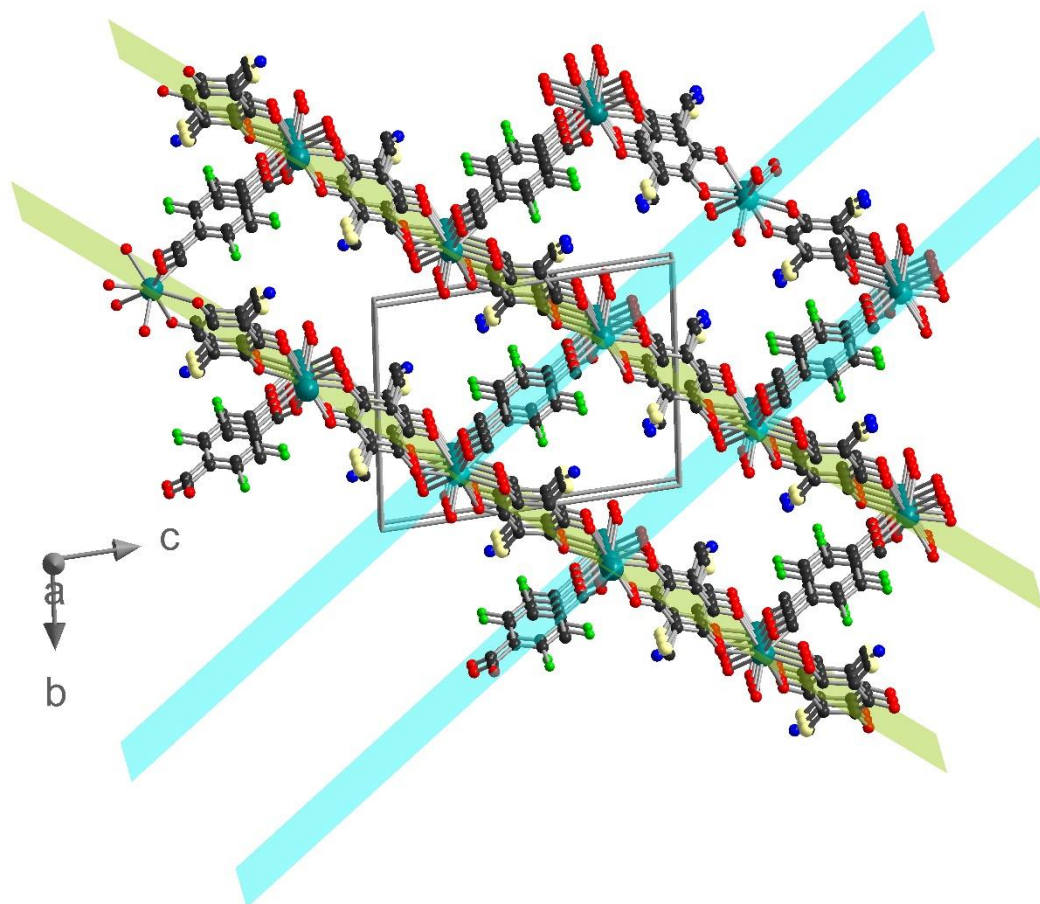

**Figure S9.** View of the crystal structure of **1** highlighting the (011) and (0-11) lattice planes in cyan and green respectively. Color code: C (black), O (red), N (blue), F (green), Cl (light yellow), Yb (teal).

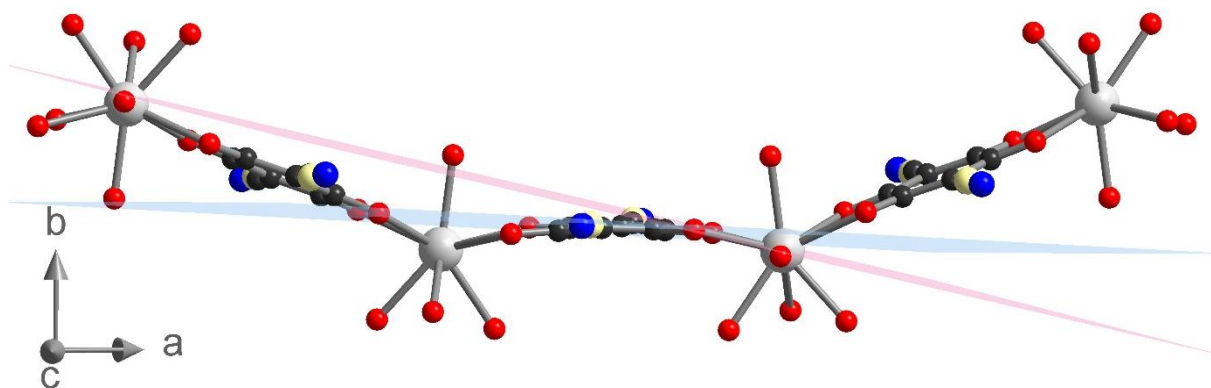

**Figure S10.** View of the Eu-anilate 1D chain of **3** highlighting the plane of the ligand (in blue) and the plane made by the Ln metal centre and the two coordinated O atoms (in red). Color code: C (black), O (red), N (blue), F (green), Cl (light yellow), Eu (gray).

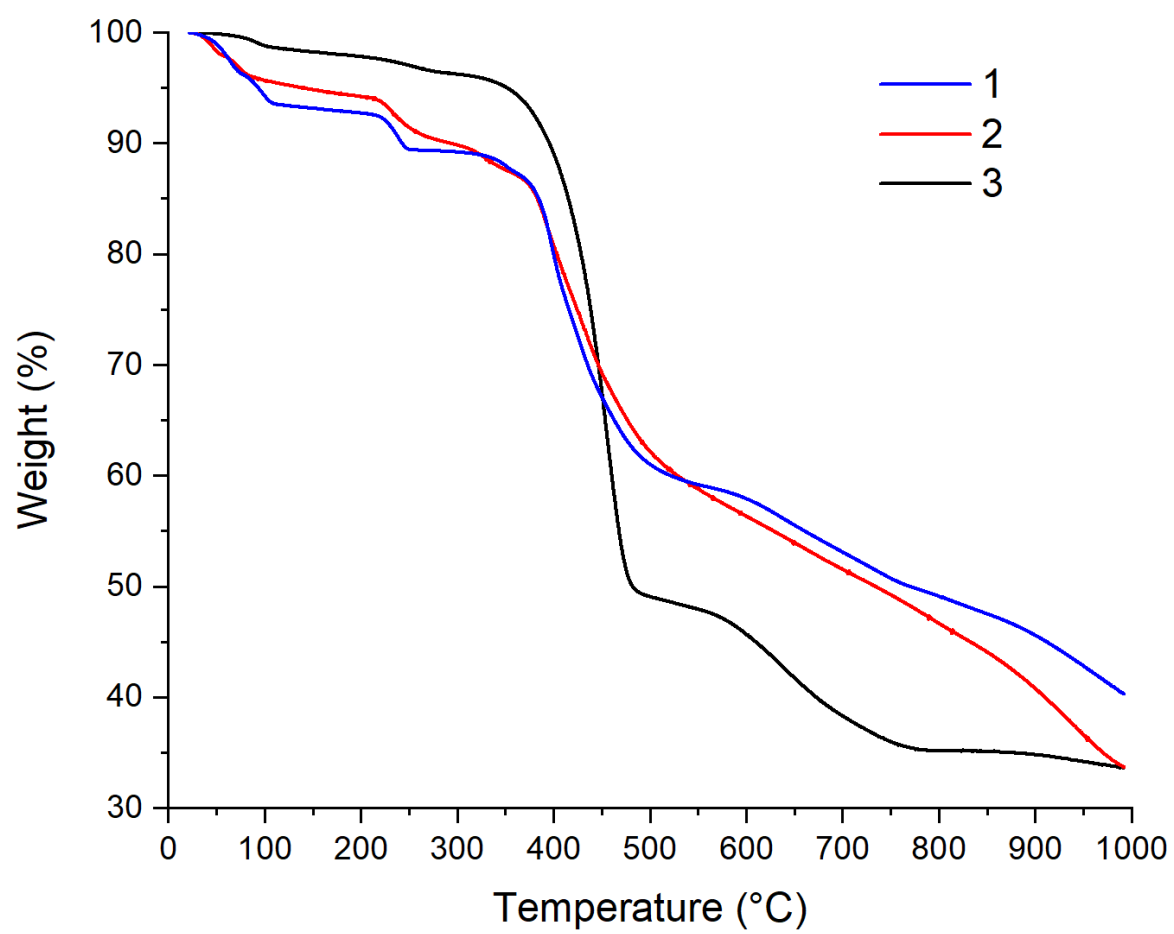

**Figure S11.** TGA of compounds **2** and **3**.
